# Supplementary material for: Tracking the slopes: A spatio-temporal prediction model for backcountry skiing activity in the Swiss Alps using UGC
Source: Copernicus journal article supplement (doi:10.5194/egusphere-2025-2344), 2025-06-06
Supplement: Supplementary file 1 [file egusphere-2025-2344-supplement.pdf]

# Supplement to ‘Tracking the slopes: A spatio-temporal prediction model for backcountry skiing activity in the Swiss Alps using UGC’

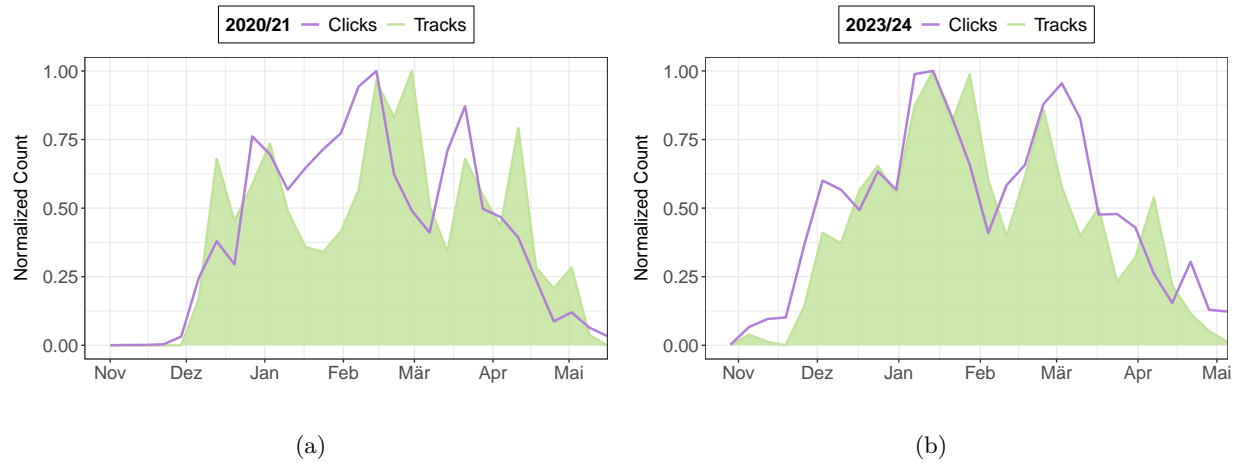

Figure S1: Normalized and weekly aggregated click and track counts for (a) 2020/21 and (b) 2023/24 season. Clicks and tracks are aggregated over the whole study area

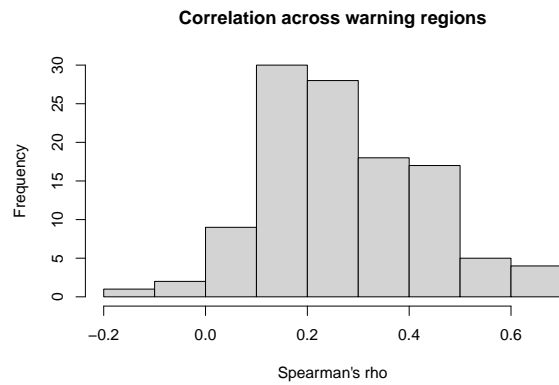

Figure S2: Histogram of correlation between click and track counts per warning region. Correlations range from 0 to 0.66. In total, 21% of regions have  $\rho > 0.4$ .

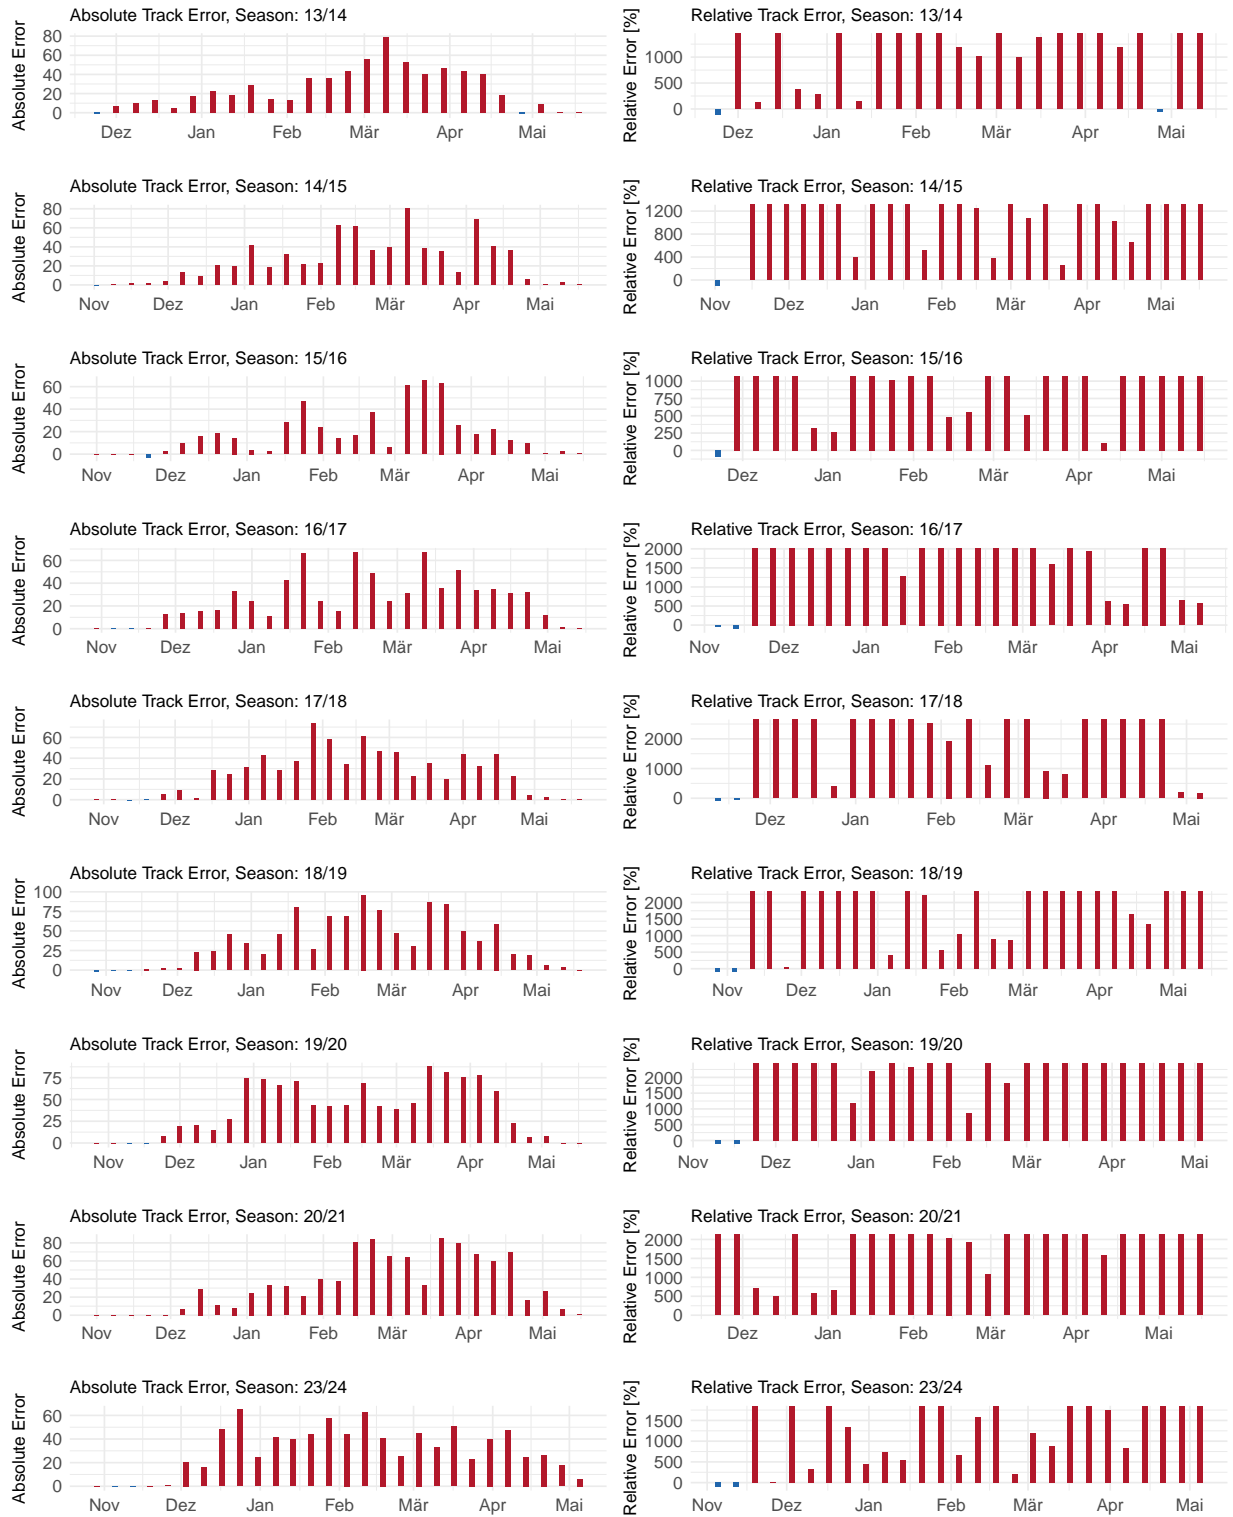

Figure S3: Relative and absolute prediction error of the track model for every season.

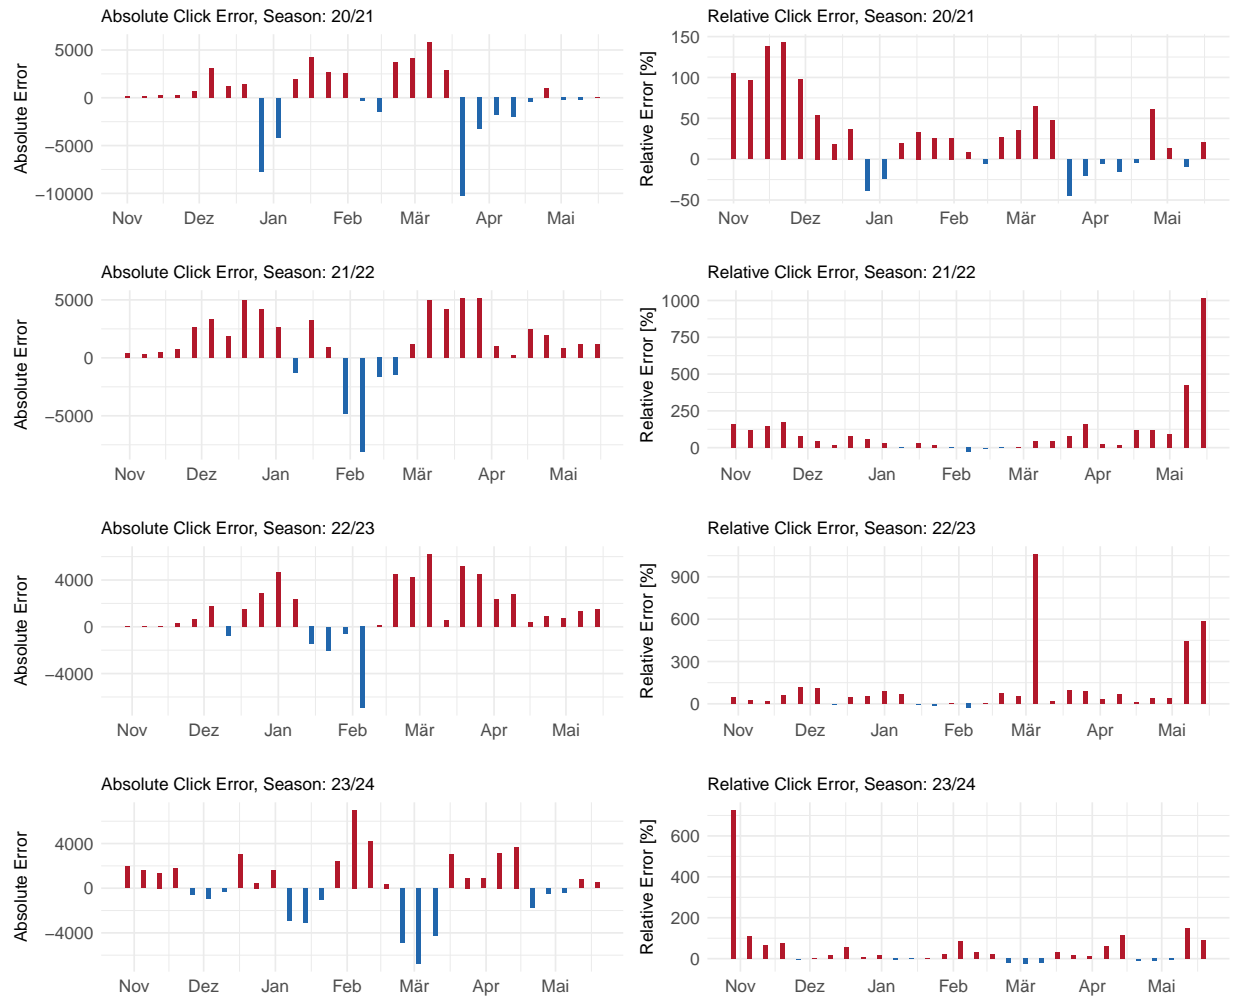

Figure S4: Relative and absolute prediction error of the click model for every season.

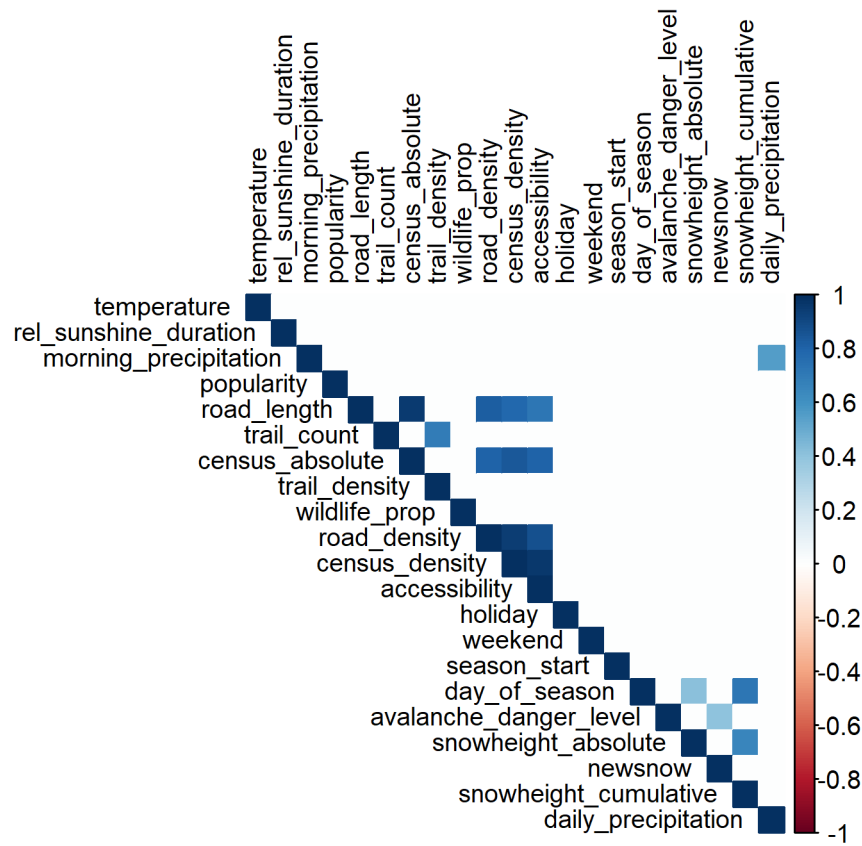

Figure S5: Correlation matrix of all initial variables for track data, only significant variable correlation are coloured. Plots were created using the 'corrplot' R package

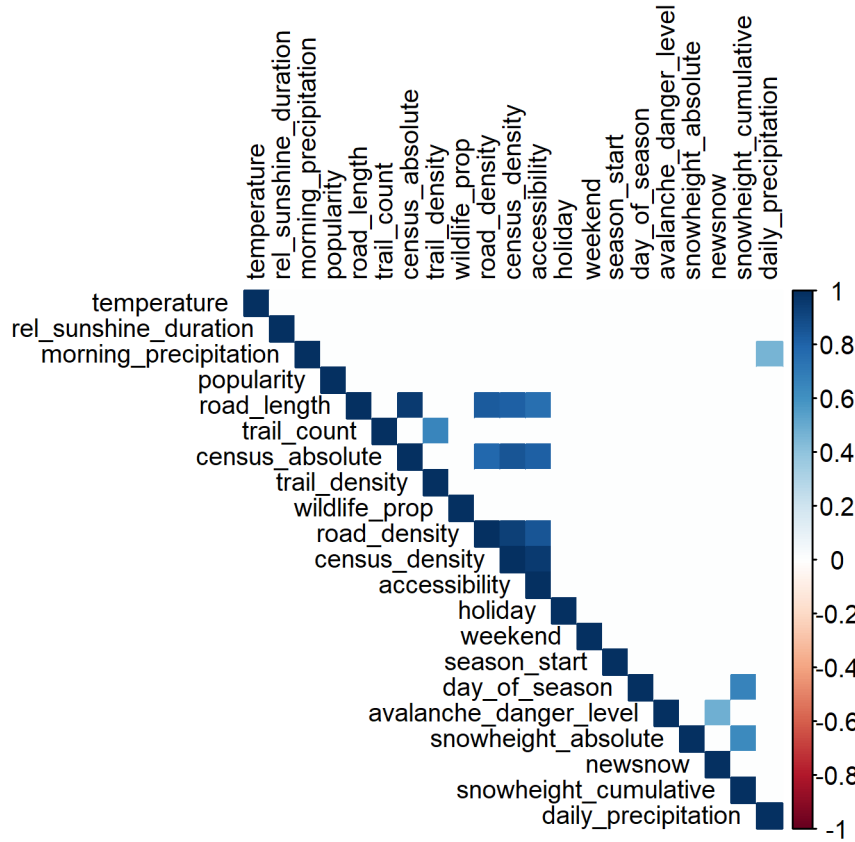

Figure S6: Correlation matrix of all initial variables for click data, only significant variable correlation are coloured. Plots were created using the 'corrplot' R package

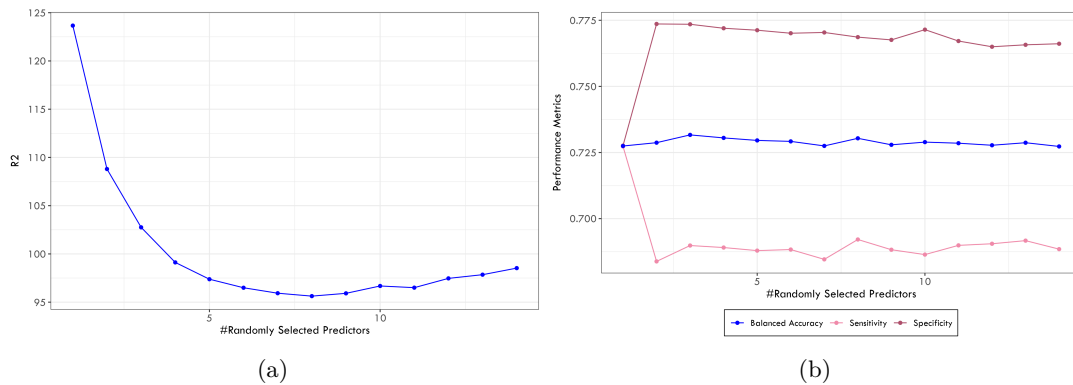

Figure S7: MTRY (number randomly selected predictors at each node) tuning for (a) tracks and (b) clicks. MTRY was chosen based on minimum RMSE (maximum balanced accuracy) for clicks (tracks). For the track model, the tuning of mtry did not show any major variations of the balanced accuracy, therefore we left it to the default value (mtry = 3). For the click model, mtry = 8 was chosen.

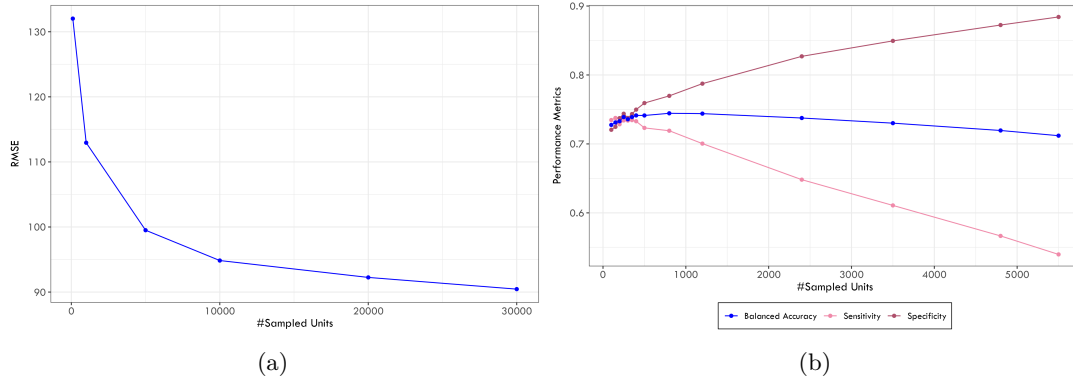

Figure S8: SAMPSIZE (number of samples used to train each tree) tuning for (a) tracks and (b) clicks. SAMPSIZE was chosen based on minimum RMSE (maximum balanced accuracy) for clicks (tracks). For the track model, 300 was chosen, even though balanced accuracy is maximized for sample size = 800. The reason for this is that sensitivity and specificity drift apart after sample size = 300, which leads to unequal performance in the two classes. For sample size = 300, performance is approximately equal in both classes and balanced accuracy is only marginally smaller than for the maximized value of 800

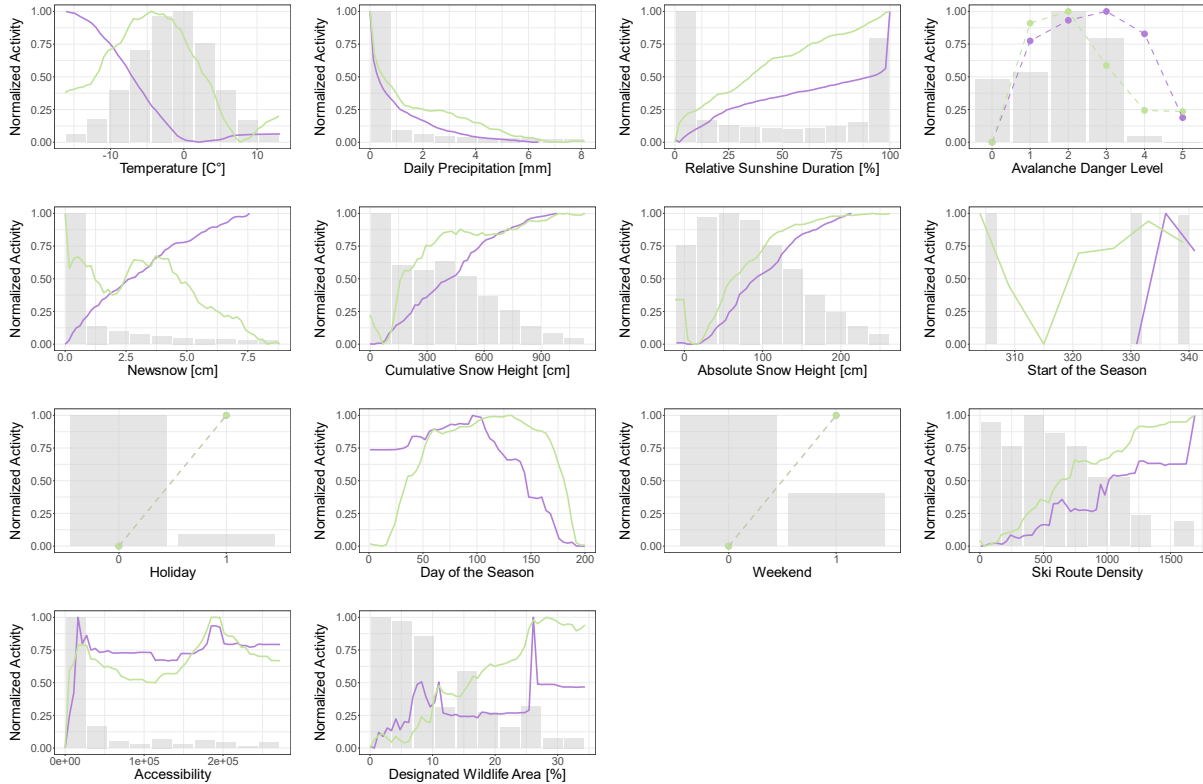

Figure S9: Partial dependence describe the marginal effect an independent variable has on the response variable. Plots were generated using the `pdp::partial()` function, where the different values of an independent variable is on the x-axis and the effect is has on the response is on the y-axis. A higher effect (higher  $\hat{y}$ ) indicates higher skiing activity.  $\hat{y}$  is min-max normalized for each plot and curve separately.

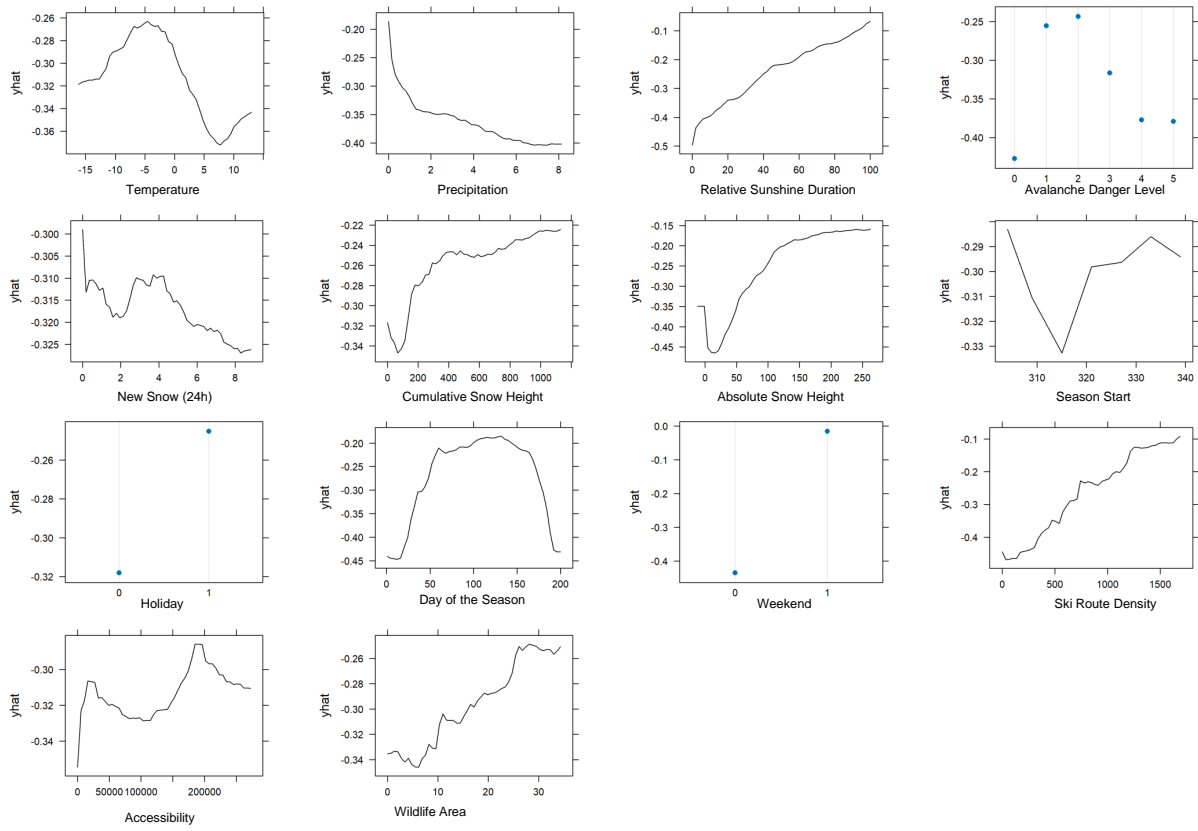

Figure S10: Non-normalized (ie., absolute value) partial dependence plots for tracks.

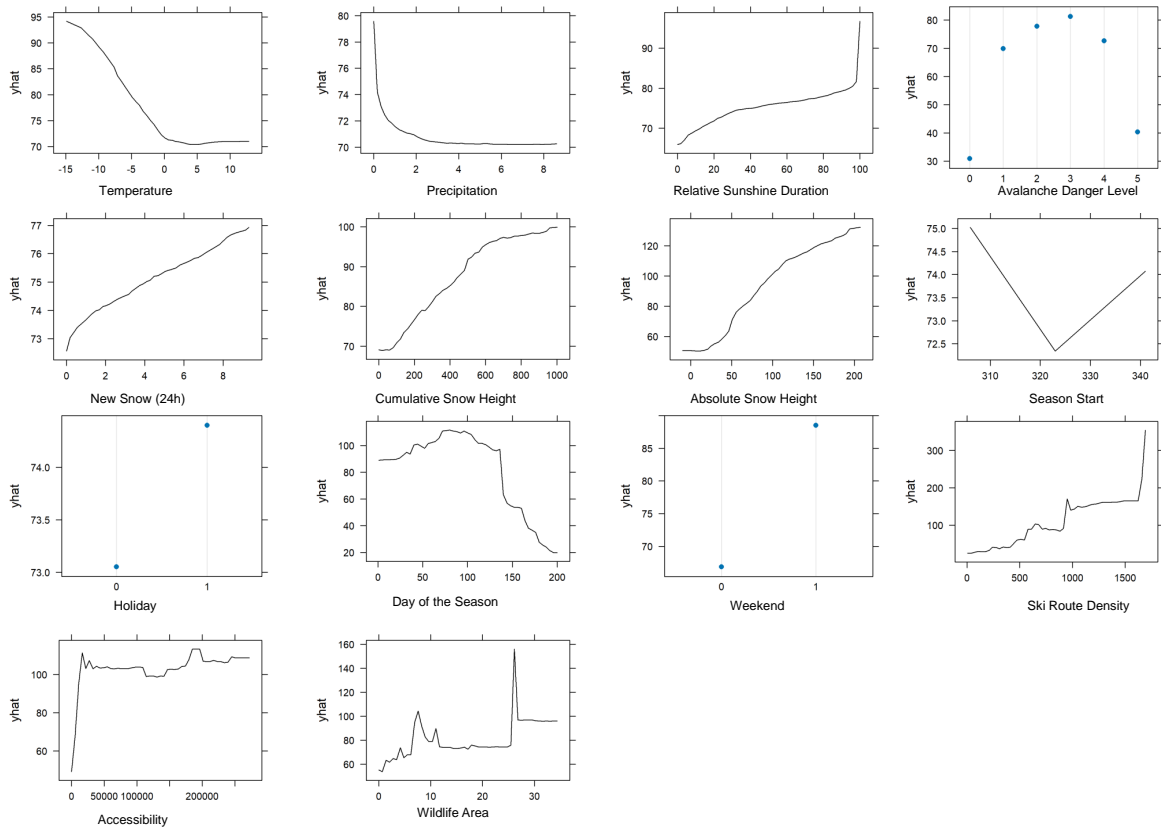

Figure S11: Non-normalized (ie., absolute value) partial dependence plots for clicks.
